# Supplementary material
Source: publisher site journal article supplement (https://www.dovepress.com/article/311785)
Supplement: Supplementary file 1 [file get_supplementary_file.php]

Supplementary Material

**Supplementary Table 1** Details of the genome-wide association studies and datasets used for the MR analysis.

**Supplementary Table 2** Characteristics of the genetic variants associated with smoking initiation and their effects on polycystic ovary syndrome.

Abbreviations: Chr, chromosome; SE, standard error; SNP, single nucleotide polymorphism.

**Supplementary Table 3** Associations between smoking initiation loci and other traits (from the GWAS Catalog)a. Abbreviations: Chr, chromosome; EA, effect allele; SNP, single nucleotide polymorphism.

aTraits associated with SNPs according to previous genome-wide association studies. Any ambiguities were not shown in this table.

**Supplementary Table 4** Effect estimates of the associations between smoking initiation and risk of polycystic ovary syndrome after excluding potential pleiotropic SNPs.

Abbreviations: CI, confidence interval; MR, Mendelian randomization; MR-PRESSO test, MR Pleiotropy RESidual Sum and Outlier test; OR, odds ratio; SNP, single nucleotide polymorphism.

| **Supplementary Table 1** Details of the genome-wide association studies and datasets used in our analyses. | | | | |
| --- | --- | --- | --- | --- |
| Exposure  or outcome | Sample size | Ancestry | Links for data download | PMID |
| Smoking phenotypes | 1,232,091 participants | European ancestry | \ | 30643251 |
| Polycystic ovary syndrome | 4,138 cases and 20,129 controls | European ancestry | <https://doi.org/10.17863/CAM.36024>. | 30566500 |

| **Supplementary Table 2** Characteristics of the genetic variants associated with smoking initiation and their effects on polycystic ovary syndrome |
| --- |

| SNP | Chr | Position | Effect allele | Non-effect allele | Smoking initiation | | PCOS | |
| --- | --- | --- | --- | --- | --- | --- | --- | --- |
|  |  |  |  |  | Beta | SE | Beta | SE |
| rs12130857 | 1 | 7791461 | A | G | -0.018 | 0.003 | 0.017 | 0.034 |
| rs301807 | 1 | 8484823 | G | A | 0.018 | 0.003 | 0.03 | 0.032 |
| rs3820277 | 1 | 18436657 | T | G | -0.019 | 0.003 | 0.03 | 0.032 |
| rs1889571 | 1 | 32195819 | G | T | 0.022 | 0.004 | 0.073 | 0.045 |
| rs10914684 | 1 | 33795572 | A | G | -0.016 | 0.003 | -0.024 | 0.033 |
| rs2637869 | 1 | 38757237 | A | G | 0.018 | 0.003 | 0.009 | 0.034 |
| rs12755632 | 1 | 41776623 | G | A | -0.015 | 0.003 | -0.009 | 0.033 |
| rs951740 | 1 | 44011737 | A | G | 0.03 | 0.003 | -0.021 | 0.032 |
| rs925524 | 1 | 46496709 | G | A | 0.016 | 0.003 | -0.045 | 0.035 |
| rs12022778 | 1 | 50603995 | C | A | 0.027 | 0.003 | -0.039 | 0.04 |
| rs11587399 | 1 | 50861071 | T | A | -0.018 | 0.003 | 0.062 | 0.04 |
| rs4912332 | 1 | 58815243 | T | C | 0.014 | 0.003 | -0.03 | 0.031 |
| rs1937443 | 1 | 66469643 | G | C | 0.02 | 0.003 | 0.011 | 0.031 |
| rs1022528 | 1 | 71490122 | A | G | 0.017 | 0.003 | 0.009 | 0.032 |
| rs12740789 | 1 | 72752073 | A | G | -0.028 | 0.003 | -0.11 | 0.04 |
| rs10789369 | 1 | 73824909 | G | A | -0.023 | 0.003 | -0.016 | 0.032 |
| rs1514176 | 1 | 74991596 | A | G | -0.019 | 0.003 | -0.043 | 0.031 |
| rs10873871 | 1 | 76689019 | G | A | 0.017 | 0.003 | -0.074 | 0.039 |
| rs11162019 | 1 | 87913176 | T | C | -0.015 | 0.003 | 0.007 | 0.032 |
| rs1008078 | 1 | 91189731 | T | C | 0.023 | 0.003 | 0.042 | 0.032 |
| rs1935571 | 1 | 96414335 | G | T | -0.016 | 0.003 | 0.047 | 0.031 |
| rs12027999 | 1 | 154206358 | C | T | -0.024 | 0.004 | -0.078 | 0.046 |
| rs45444697 | 1 | 155034632 | G | C | 0.02 | 0.003 | -0.036 | 0.038 |
| rs2901785 | 1 | 174104743 | A | G | -0.017 | 0.003 | -0.012 | 0.032 |
| rs147052174 | 1 | 179783167 | T | G | 0.062 | 0.01 | 0.22 | 0.13 |
| rs35656245 | 1 | 190957480 | A | G | 0.016 | 0.003 | -0.12 | 0.034 |
| rs12739243 | 1 | 210302043 | C | T | -0.021 | 0.003 | 0.032 | 0.037 |
| rs12563365 | 1 | 236872829 | A | G | 0.017 | 0.003 | -0.037 | 0.031 |
| rs876793 | 1 | 237852083 | C | T | -0.018 | 0.003 | -0.001 | 0.033 |
| rs114976176 | 2 | 264621 | C | A | -0.016 | 0.003 | 0.02 | 0.035 |
| rs62106258 | 2 | 417167 | C | T | -0.045 | 0.006 | 0.28 | 0.093 |
| rs6731872 | 2 | 624205 | G | T | 0.032 | 0.003 | -0.045 | 0.041 |
| rs1022376 | 2 | 22067213 | C | T | -0.015 | 0.003 | 0.053 | 0.032 |
| rs61533748 | 2 | 22582968 | C | T | 0.017 | 0.003 | -0.022 | 0.032 |
| rs72790288 | 2 | 29513404 | A | G | -0.046 | 0.008 | 0.067 | 0.091 |
| rs2710634 | 2 | 32808804 | C | T | -0.018 | 0.003 | 0.011 | 0.032 |
| rs62137126 | 2 | 44250149 | G | A | -0.024 | 0.004 | 0.053 | 0.049 |
| rs1004787 | 2 | 45159091 | A | G | 0.028 | 0.003 | -0.009 | 0.032 |
| rs7598402 | 2 | 50735943 | G | C | -0.015 | 0.003 | 0.031 | 0.031 |
| rs10490159 | 2 | 51341259 | T | C | 0.017 | 0.003 | 0.038 | 0.032 |
| rs1518393 | 2 | 58171220 | C | A | 0.017 | 0.003 | -0.047 | 0.032 |
| rs17616642 | 2 | 59022210 | G | G | -0.017 | 0.003 | -0.083 | 0.037 |
| rs6730325 | 2 | 59315828 | A | G | -0.015 | 0.003 | -0.074 | 0.033 |
| rs2539706 | 2 | 59819545 | A | G | 0.016 | 0.003 | -0.006 | 0.031 |
| rs7585579 | 2 | 60024857 | G | C | 0.02 | 0.003 | 0.004 | 0.031 |
| rs1863161 | 2 | 60139524 | A | G | 0.015 | 0.003 | -0.028 | 0.031 |
| rs359247 | 2 | 60477052 | T | A | 0.022 | 0.003 | 0.008 | 0.032 |
| rs62180324 | 2 | 63416606 | A | G | -0.02 | 0.003 | 0.014 | 0.038 |
| rs6750107 | 2 | 80748807 | A | G | 0.015 | 0.003 | 0.017 | 0.032 |
| rs12714017 | 2 | 80999398 | C | T | 0.015 | 0.003 | -0.002 | 0.031 |
| rs56208390 | 2 | 83247997 | G | A | 0.022 | 0.004 | 0.052 | 0.049 |
| rs11692435 | 2 | 98275354 | A | G | 0.025 | 0.005 | -0.012 | 0.065 |
| rs13392222 | 2 | 100672408 | C | A | -0.023 | 0.004 | 0.015 | 0.047 |
| rs1901477 | 2 | 104126983 | G | A | 0.03 | 0.003 | -0.027 | 0.031 |
| rs11889814 | 2 | 104432494 | C | A | -0.021 | 0.004 | -0.066 | 0.045 |
| rs3811038 | 2 | 113240183 | C | T | 0.019 | 0.003 | -0.049 | 0.035 |
| rs75210106 | 2 | 113246436 | T | V | -0.019 | 0.003 | -0.06 | 0.041 |
| rs34399632 | 2 | 137571174 | G | A | 0.019 | 0.003 | -0.006 | 0.037 |
| rs74697736 | 2 | 145412271 | A | G | 0.022 | 0.003 | -0.004 | 0.035 |
| rs6756212 | 2 | 146140132 | T | C | -0.034 | 0.003 | 0.009 | 0.031 |
| rs16826827 | 2 | 147825689 | C | T | -0.022 | 0.004 | -0.001 | 0.046 |
| rs1445649 | 2 | 155682556 | C | T | 0.021 | 0.003 | 0.009 | 0.031 |
| rs1722666 | 2 | 161816880 | T | C | 0.016 | 0.003 | 0.006 | 0.035 |
| rs11678980 | 2 | 162101261 | A | G | 0.018 | 0.003 | 0.027 | 0.035 |
| rs12474587 | 2 | 162802993 | T | G | 0.024 | 0.003 | 0.006 | 0.031 |
| rs357304 | 2 | 164862639 | C | T | 0.017 | 0.003 | 0.066 | 0.035 |
| rs13007361 | 2 | 166250244 | A | G | 0.018 | 0.003 | 0.015 | 0.039 |
| rs7600835 | 2 | 172521827 | A | G | -0.015 | 0.003 | 0.041 | 0.035 |
| rs6750529 | 2 | 182027603 | T | C | 0.02 | 0.003 | 0.041 | 0.035 |
| rs17229285 | 2 | 199523122 | T | C | -0.015 | 0.003 | 0.029 | 0.031 |
| rs3115418 | 2 | 200936399 | C | T | -0.014 | 0.003 | -0.015 | 0.031 |
| rs62193862 | 2 | 202843875 | A | G | 0.024 | 0.004 | 0.057 | 0.055 |
| rs4674916 | 2 | 225365635 | A | C | -0.018 | 0.003 | -0.007 | 0.033 |
| rs4674993 | 2 | 226332033 | G | A | -0.024 | 0.003 | -0.027 | 0.038 |
| rs11713899 | 3 | 2365026 | C | A | 0.019 | 0.003 | -0.021 | 0.042 |
| rs748832 | 3 | 16851202 | G | A | 0.017 | 0.003 | -0.015 | 0.032 |
| rs10446419 | 3 | 25725501 | G | A | -0.02 | 0.003 | 0.02 | 0.041 |
| rs13319205 | 3 | 47800216 | A | T | 0.017 | 0.003 | 0.02 | 0.035 |
| rs3172494 | 3 | 48731487 | T | G | -0.029 | 0.004 | -0.15 | 0.072 |
| rs2526390 | 3 | 50192760 | T | C | 0.02 | 0.003 | 0.051 | 0.034 |
| rs2276825 | 3 | 52886605 | C | T | 0.019 | 0.003 | -0.019 | 0.036 |
| rs2306866 | 3 | 53766212 | T | A | -0.017 | 0.003 | 0.003 | 0.033 |
| rs73831818 | 3 | 55988394 | G | A | 0.032 | 0.005 | 0.039 | 0.063 |
| rs1910236 | 3 | 59434420 | A | G | 0.015 | 0.003 | 0.021 | 0.032 |
| rs7640107 | 3 | 59966156 | T | C | -0.014 | 0.003 | 0.077 | 0.032 |
| rs2734390 | 3 | 60459291 | G | A | 0.015 | 0.003 | -0.037 | 0.032 |
| rs221988 | 3 | 64234307 | C | A | -0.015 | 0.003 | -0.015 | 0.033 |
| rs11128203 | 3 | 71064431 | A | T | 0.02 | 0.003 | -0.002 | 0.033 |
| rs62246017 | 3 | 71483084 | A | G | -0.016 | 0.003 | 0.022 | 0.035 |
| rs4543050 | 3 | 74954560 | T | A | 0.022 | 0.003 | 0.077 | 0.041 |
| rs6782116 | 3 | 77176032 | T | C | -0.015 | 0.003 | -0.061 | 0.032 |
| rs13066050 | 3 | 81325861 | T | C | 0.019 | 0.003 | 0.045 | 0.038 |
| rs12633090 | 3 | 83241365 | C | G | -0.023 | 0.003 | -0.024 | 0.042 |
| rs1549979 | 3 | 85460131 | T | C | -0.025 | 0.003 | -0.006 | 0.033 |
| rs57153235 | 3 | 85902536 | G | T | -0.019 | 0.003 | 0.044 | 0.034 |
| rs6437769 | 3 | 107997514 | T | C | 0.014 | 0.003 | 0.042 | 0.031 |
| rs9288999 | 3 | 114147927 | A | G | 0.017 | 0.003 | 0.017 | 0.035 |
| rs6438436 | 3 | 117822149 | T | C | 0.025 | 0.003 | -0.033 | 0.039 |
| rs12053870 | 3 | 118302515 | G | T | 0.016 | 0.003 | -0.023 | 0.031 |
| rs9826984 | 3 | 131945722 | A | G | -0.014 | 0.003 | 0.025 | 0.031 |
| rs2279829 | 3 | 147106319 | T | C | -0.017 | 0.003 | 0.01 | 0.037 |
| rs2319545 | 3 | 147719648 | A | C | 0.023 | 0.004 | 0.051 | 0.044 |
| rs10935779 | 3 | 149543102 | T | C | -0.014 | 0.003 | 0.005 | 0.031 |
| rs963354 | 3 | 157393770 | A | C | 0.015 | 0.003 | -0.067 | 0.033 |
| rs1714521 | 3 | 158284861 | C | A | -0.016 | 0.003 | -0.004 | 0.031 |
| rs1449012 | 3 | 159048333 | T | C | -0.015 | 0.003 | -0.026 | 0.031 |
| rs9850597 | 3 | 161761866 | A | G | -0.019 | 0.003 | -0.036 | 0.04 |
| rs1187820 | 3 | 173072584 | T | C | -0.014 | 0.003 | -0.026 | 0.033 |
| rs16828799 | 3 | 173353739 | T | G | 0.02 | 0.004 | 0.022 | 0.043 |
| rs9841807 | 3 | 175718927 | T | C | 0.016 | 0.003 | -0.016 | 0.034 |
| rs7631379 | 3 | 181409057 | C | T | 0.021 | 0.003 | -0.021 | 0.041 |
| rs4140932 | 4 | 15458598 | A | T | -0.014 | 0.003 | 0.051 | 0.031 |
| rs12642744 | 4 | 28027176 | T | G | -0.017 | 0.003 | -0.016 | 0.036 |
| rs59537158 | 4 | 28246049 | T | C | 0.022 | 0.003 | -0.048 | 0.041 |
| rs1389171 | 4 | 28822284 | A | T | -0.017 | 0.003 | -0.041 | 0.037 |
| rs55944129 | 4 | 29082156 | C | T | -0.018 | 0.003 | 0.01 | 0.034 |
| rs58400863 | 4 | 31184484 | A | G | -0.02 | 0.003 | 0.056 | 0.033 |
| rs7657022 | 4 | 35501032 | G | A | 0.018 | 0.003 | 0.028 | 0.031 |
| rs112725451 | 4 | 68017710 | T | C | 0.026 | 0.003 | 0.1 | 0.042 |
| rs1160685 | 4 | 94052854 | G | C | 0.015 | 0.003 | 0.025 | 0.031 |
| rs1435479 | 4 | 94550450 | T | G | 0.016 | 0.003 | 0.02 | 0.034 |
| rs3934797 | 4 | 112467612 | A | G | -0.021 | 0.003 | 0.035 | 0.043 |
| rs71602617 | 4 | 136406155 | T | C | -0.018 | 0.003 | 0.002 | 0.036 |
| rs7696257 | 4 | 137474783 | A | G | 0.015 | 0.003 | 0.037 | 0.032 |
| rs13109980 | 4 | 140886963 | A | G | -0.022 | 0.003 | -0.031 | 0.033 |
| rs1116690 | 4 | 143510148 | G | A | 0.016 | 0.003 | 0.024 | 0.036 |
| rs13110073 | 4 | 147797913 | C | T | -0.025 | 0.003 | -0.019 | 0.032 |
| rs62340589 | 4 | 176875795 | C | G | 0.017 | 0.003 | -0.009 | 0.038 |
| rs12517438 | 5 | 30842054 | G | T | 0.015 | 0.003 | -0.002 | 0.031 |
| rs35375873 | 5 | 43190647 | C | G | -0.027 | 0.004 | -0.026 | 0.056 |
| rs986714 | 5 | 50821338 | T | A | -0.016 | 0.003 | -0.013 | 0.031 |
| rs71592686 | 5 | 60121271 | C | T | 0.021 | 0.003 | 0.063 | 0.035 |
| rs2028269 | 5 | 79308315 | A | G | 0.016 | 0.003 | 0.037 | 0.032 |
| rs6874731 | 5 | 80263865 | G | T | 0.015 | 0.003 | 0.021 | 0.031 |
| rs6452785 | 5 | 87685500 | T | C | -0.027 | 0.003 | -0.052 | 0.031 |
| rs10805858 | 5 | 88873832 | T | A | 0.018 | 0.003 | 0.015 | 0.035 |
| rs42417 | 5 | 94198290 | T | C | 0.017 | 0.003 | 0.057 | 0.035 |
| rs72780746 | 5 | 103929588 | C | T | -0.026 | 0.003 | -0.037 | 0.04 |
| rs10060196 | 5 | 106455988 | A | C | 0.018 | 0.003 | -0.047 | 0.032 |
| rs72789626 | 5 | 106825618 | A | T | -0.026 | 0.004 | -0.023 | 0.049 |
| rs17165769 | 5 | 107365642 | G | A | 0.016 | 0.003 | -0.001 | 0.032 |
| rs329124 | 5 | 133865452 | G | A | -0.016 | 0.003 | -0.042 | 0.031 |
| rs1385108 | 5 | 154839646 | T | C | 0.019 | 0.003 | -0.054 | 0.036 |
| rs1173461 | 5 | 157707571 | T | C | 0.017 | 0.003 | 0.02 | 0.033 |
| rs11956866 | 5 | 161018271 | G | T | -0.015 | 0.003 | -0.044 | 0.031 |
| rs3909281 | 5 | 165096435 | G | T | 0.021 | 0.003 | 0.02 | 0.032 |
| rs3843905 | 5 | 165427280 | T | C | -0.015 | 0.003 | -0.054 | 0.032 |
| rs79476395 | 5 | 166063680 | G | A | 0.033 | 0.005 | -0.16 | 0.067 |
| rs6890961 | 5 | 166778503 | T | C | -0.019 | 0.003 | -0.038 | 0.034 |
| rs4044321 | 5 | 166989513 | G | A | -0.023 | 0.003 | -0.01 | 0.033 |
| rs2173019 | 5 | 167614971 | A | T | 0.028 | 0.003 | 0.046 | 0.041 |
| rs10042827 | 5 | 170299916 | C | T | 0.017 | 0.003 | 0.003 | 0.034 |
| rs359431 | 5 | 173288534 | T | C | -0.014 | 0.003 | 0.025 | 0.031 |
| rs1059490 | 6 | 26171250 | C | T | -0.019 | 0.003 | 0.043 | 0.034 |
| rs6932350 | 6 | 26571629 | A | T | 0.015 | 0.003 | -0.008 | 0.033 |
| rs1150668 | 6 | 28129789 | G | T | -0.019 | 0.003 | 0.01 | 0.033 |
| rs3218116 | 6 | 41901763 | T | C | -0.02 | 0.003 | 0.003 | 0.036 |
| rs160631 | 6 | 52895230 | G | T | -0.017 | 0.003 | 0.016 | 0.035 |
| rs7743165 | 6 | 67521222 | G | T | 0.019 | 0.003 | -0.01 | 0.031 |
| rs10945141 | 6 | 69470709 | A | G | 0.018 | 0.003 | -0.018 | 0.035 |
| rs17554906 | 6 | 92226609 | C | G | 0.014 | 0.003 | 0.042 | 0.031 |
| rs619087 | 6 | 94175279 | G | A | 0.014 | 0.003 | 0.018 | 0.031 |
| rs6568832 | 6 | 97702876 | A | G | 0.019 | 0.003 | 0.041 | 0.035 |
| rs12195240 | 6 | 98636905 | A | G | 0.025 | 0.003 | -0.007 | 0.034 |
| rs6936160 | 6 | 100347745 | T | C | 0.02 | 0.003 | 0.003 | 0.034 |
| rs12530388 | 6 | 101329173 | C | A | -0.018 | 0.003 | 0.02 | 0.031 |
| rs3800227 | 6 | 108994161 | G | A | 0.017 | 0.003 | 0.005 | 0.036 |
| rs118202 | 6 | 111658371 | T | G | -0.037 | 0.003 | -0.011 | 0.04 |
| rs73008357 | 6 | 156431856 | C | A | -0.022 | 0.004 | 0.044 | 0.047 |
| rs9331343 | 6 | 157738258 | C | T | -0.014 | 0.003 | 0.059 | 0.048 |
| rs10698713 | 6 | 158882320 | A | G | -0.034 | 0.006 | 0.05 | 0.072 |
| rs1737329 | 6 | 163807748 | G | C | 0.017 | 0.003 | -0.019 | 0.035 |
| rs10272990 | 7 | 1703675 | C | T | -0.021 | 0.003 | -0.014 | 0.034 |
| rs6948707 | 7 | 1870794 | G | T | 0.024 | 0.003 | -0.053 | 0.032 |
| rs13237637 | 7 | 3503207 | C | G | -0.024 | 0.003 | 0.036 | 0.031 |
| rs7809303 | 7 | 69484366 | A | G | -0.021 | 0.003 | -0.036 | 0.033 |
| rs7802996 | 7 | 77771983 | T | C | -0.021 | 0.003 | 0.01 | 0.042 |
| rs1030015 | 7 | 78139581 | T | G | 0.014 | 0.003 | 0.042 | 0.031 |
| rs4727189 | 7 | 88442568 | C | T | 0.015 | 0.003 | -0.063 | 0.032 |
| rs76841737 | 7 | 91281409 | G | C | -0.023 | 0.004 | -0.025 | 0.051 |
| rs11768481 | 7 | 96629103 | A | C | -0.019 | 0.003 | 0.027 | 0.035 |
| rs1799068 | 7 | 97707069 | T | G | 0.017 | 0.003 | 0.006 | 0.032 |
| rs13437771 | 7 | 99071478 | G | A | -0.027 | 0.004 | 0.08 | 0.044 |
| rs11766326 | 7 | 111100585 | C | T | -0.018 | 0.003 | -0.009 | 0.031 |
| rs6968380 | 7 | 114940159 | A | G | -0.023 | 0.003 | 0.029 | 0.033 |
| rs112913817 | 7 | 115077394 | G | A | 0.078 | 0.012 | 0.36 | 0.16 |
| rs10233018 | 7 | 117523709 | G | A | 0.025 | 0.003 | 0.008 | 0.031 |
| rs10953957 | 7 | 121954709 | A | G | 0.014 | 0.003 | -0.012 | 0.032 |
| rs77283305 | 7 | 132593831 | A | G | -0.015 | 0.003 | -0.038 | 0.034 |
| rs10279261 | 7 | 133589846 | A | G | -0.019 | 0.003 | -0.01 | 0.032 |
| rs1561112 | 7 | 133840652 | C | T | -0.015 | 0.003 | -0.005 | 0.032 |
| rs2952251 | 8 | 10143164 | G | A | 0.016 | 0.003 | -0.079 | 0.036 |
| rs4326350 | 8 | 10763655 | G | C | -0.018 | 0.003 | -0.017 | 0.032 |
| rs11783093 | 8 | 27425349 | T | C | -0.047 | 0.003 | 0.015 | 0.043 |
| rs7836565 | 8 | 52569449 | T | C | -0.016 | 0.003 | 0.028 | 0.035 |
| rs13261666 | 8 | 59814666 | T | G | -0.02 | 0.003 | -0.046 | 0.031 |
| rs3850736 | 8 | 64912021 | G | C | 0.019 | 0.003 | 0.003 | 0.031 |
| rs2063976 | 8 | 91096366 | T | C | -0.02 | 0.003 | -0.009 | 0.033 |
| rs6993429 | 8 | 92733282 | A | A | -0.019 | 0.003 | -0.04 | 0.031 |
| rs6986430 | 8 | 93048104 | C | T | -0.024 | 0.003 | 0.01 | 0.038 |
| rs9987376 | 8 | 93190014 | G | T | -0.02 | 0.003 | 0.041 | 0.031 |
| rs290601 | 8 | 115374642 | T | C | 0.016 | 0.003 | 0.01 | 0.034 |
| rs3847244 | 9 | 3025368 | T | C | 0.019 | 0.003 | -0.017 | 0.033 |
| rs11791671 | 9 | 3398679 | T | C | 0.028 | 0.005 | 0.062 | 0.068 |
| rs7024924 | 9 | 8282399 | C | T | 0.019 | 0.003 | 0.003 | 0.04 |
| rs6474609 | 9 | 10981069 | A | T | -0.016 | 0.003 | 0.002 | 0.033 |
| rs1931431 | 9 | 11161799 | C | G | 0.018 | 0.003 | -0.029 | 0.031 |
| rs7867822 | 9 | 20676454 | G | A | -0.015 | 0.003 | 0.012 | 0.032 |
| rs10966092 | 9 | 23831658 | C | T | -0.02 | 0.003 | -0.003 | 0.035 |
| rs10969352 | 9 | 29747488 | A | T | 0.014 | 0.003 | -0.022 | 0.031 |
| rs4877285 | 9 | 81354129 | A | G | -0.018 | 0.003 | -0.059 | 0.034 |
| rs1930371 | 9 | 81444104 | T | C | -0.017 | 0.003 | -0.012 | 0.036 |
| rs2378662 | 9 | 86707289 | A | G | 0.015 | 0.003 | 0.027 | 0.032 |
| rs1927901 | 9 | 120519111 | C | T | -0.014 | 0.003 | 0.052 | 0.031 |
| rs4837631 | 9 | 122061948 | T | C | -0.015 | 0.003 | -0.002 | 0.031 |
| rs1759433 | 9 | 128073097 | A | G | 0.015 | 0.003 | 0.005 | 0.032 |
| rs34553878 | 9 | 134334588 | G | A | 0.025 | 0.004 | 0.03 | 0.052 |
| rs7026534 | 9 | 134907263 | G | T | -0.017 | 0.003 | -0.017 | 0.034 |
| rs10858334 | 9 | 137989785 | G | C | 0.023 | 0.004 | 0.015 | 0.048 |
| rs10905461 | 10 | 8803551 | C | T | -0.016 | 0.003 | 0.078 | 0.037 |
| rs7920501 | 10 | 10043159 | A | T | -0.016 | 0.003 | -0.021 | 0.033 |
| rs1291821 | 10 | 11133823 | G | A | 0.014 | 0.003 | -0.023 | 0.031 |
| rs11258417 | 10 | 13533053 | T | C | -0.015 | 0.003 | 0.008 | 0.032 |
| rs7072776 | 10 | 22032942 | G | A | -0.022 | 0.003 | 0.053 | 0.035 |
| rs2796793 | 10 | 36634124 | A | G | 0.014 | 0.003 | -0.034 | 0.031 |
| rs1733760 | 10 | 56698174 | C | T | 0.015 | 0.003 | -0.058 | 0.031 |
| rs7921378 | 10 | 63674885 | C | G | -0.023 | 0.003 | -0.044 | 0.031 |
| rs7901883 | 10 | 103186838 | A | G | -0.019 | 0.003 | -0.019 | 0.037 |
| rs11594623 | 10 | 103960351 | C | T | 0.027 | 0.003 | -0.007 | 0.037 |
| rs11191269 | 10 | 104120522 | G | C | 0.018 | 0.003 | 0.001 | 0.04 |
| rs28408682 | 10 | 104403310 | G | A | 0.017 | 0.003 | -0.031 | 0.035 |
| rs12244388 | 10 | 104640052 | A | G | 0.026 | 0.003 | 0.04 | 0.032 |
| rs34970111 | 10 | 106078937 | T | C | -0.015 | 0.003 | -0.008 | 0.033 |
| rs9787523 | 10 | 106460460 | C | T | -0.016 | 0.003 | 0.005 | 0.031 |
| rs11192347 | 10 | 106929313 | A | G | -0.026 | 0.004 | 0.015 | 0.05 |
| rs10885480 | 10 | 115378364 | C | A | -0.019 | 0.003 | 0.038 | 0.034 |
| rs4752018 | 10 | 118678712 | A | C | 0.019 | 0.003 | -0.017 | 0.037 |
| rs9423279 | 10 | 125680419 | G | C | -0.019 | 0.003 | 0.001 | 0.038 |
| rs6265 | 11 | 27679916 | T | C | -0.029 | 0.003 | -0.015 | 0.041 |
| rs4275621 | 11 | 28652996 | G | A | -0.021 | 0.003 | 0.023 | 0.032 |
| rs62618693 | 11 | 32956492 | T | C | -0.035 | 0.006 | 0.063 | 0.082 |
| rs2939756 | 11 | 41436297 | A | G | -0.016 | 0.003 | -0.006 | 0.032 |
| rs1381775 | 11 | 42442826 | C | T | -0.016 | 0.003 | -0.02 | 0.035 |
| rs2959084 | 11 | 46078656 | A | G | 0.017 | 0.003 | -0.023 | 0.034 |
| rs3740977 | 11 | 46393574 | C | T | 0.019 | 0.003 | 0.1 | 0.042 |
| rs61886926 | 11 | 64133552 | T | C | -0.018 | 0.003 | -0.03 | 0.032 |
| rs61884449 | 11 | 64485193 | T | C | 0.02 | 0.004 | 0.033 | 0.045 |
| rs644740 | 11 | 65561468 | T | C | -0.014 | 0.003 | 0.002 | 0.031 |
| rs7943721 | 11 | 73309393 | A | G | -0.021 | 0.003 | -0.016 | 0.045 |
| rs7929518 | 11 | 85980958 | G | A | 0.019 | 0.003 | 0.016 | 0.037 |
| rs586699 | 11 | 92289734 | A | G | -0.015 | 0.003 | -0.006 | 0.031 |
| rs76460663 | 11 | 111979741 | G | C | -0.042 | 0.006 | 0.038 | 0.087 |
| rs2155646 | 11 | 112912811 | C | T | 0.038 | 0.003 | 0.027 | 0.032 |
| rs1713676 | 11 | 113660576 | G | A | -0.017 | 0.003 | 0.028 | 0.031 |
| rs238896 | 11 | 113994505 | A | G | -0.017 | 0.003 | -0.024 | 0.032 |
| rs540860 | 11 | 121530888 | G | A | 0.018 | 0.003 | -0.026 | 0.032 |
| rs1944689 | 11 | 121634334 | T | G | 0.018 | 0.003 | -0.046 | 0.04 |
| rs1834306 | 11 | 122023187 | G | A | -0.014 | 0.003 | 0.049 | 0.033 |
| rs1106363 | 11 | 131966264 | T | C | 0.017 | 0.003 | 0.018 | 0.033 |
| rs2010921 | 11 | 132098205 | A | G | 0.017 | 0.003 | 0 | 0.035 |
| rs11057005 | 12 | 16748721 | G | A | -0.016 | 0.003 | -0.021 | 0.031 |
| rs13906 | 12 | 49952394 | T | C | -0.025 | 0.004 | 0.007 | 0.05 |
| rs4759229 | 12 | 56474480 | G | A | 0.016 | 0.003 | 0.13 | 0.033 |
| rs7969559 | 12 | 69655167 | G | A | -0.017 | 0.003 | -0.003 | 0.035 |
| rs7134009 | 12 | 75263193 | C | T | -0.016 | 0.003 | 0.021 | 0.034 |
| rs77215829 | 12 | 112618346 | C | A | -0.024 | 0.004 | -0.078 | 0.049 |
| rs1109480 | 12 | 121083279 | A | C | -0.017 | 0.003 | -0.053 | 0.032 |
| rs11611651 | 12 | 133380790 | A | G | 0.027 | 0.005 | -0.019 | 0.056 |
| rs17197663 | 13 | 38172867 | A | G | -0.022 | 0.004 | -0.07 | 0.046 |
| rs4264267 | 13 | 38359676 | T | C | 0.015 | 0.003 | -0.004 | 0.032 |
| rs61959481 | 13 | 55834929 | A | G | -0.02 | 0.003 | -0.002 | 0.038 |
| rs3098272 | 13 | 55931424 | C | A | -0.018 | 0.003 | 0.032 | 0.038 |
| rs9538162 | 13 | 59265043 | C | T | 0.017 | 0.003 | -0.004 | 0.031 |
| rs1413119 | 13 | 59339281 | T | C | -0.015 | 0.003 | -0.002 | 0.032 |
| rs56367474 | 13 | 59454139 | T | C | -0.017 | 0.003 | -0.049 | 0.035 |
| rs55786907 | 13 | 59871584 | G | A | 0.019 | 0.003 | -0.016 | 0.042 |
| rs4886207 | 13 | 60705792 | C | T | -0.016 | 0.003 | 0.06 | 0.032 |
| rs9540731 | 13 | 66949370 | T | C | -0.018 | 0.003 | -0.04 | 0.032 |
| rs9545155 | 13 | 80191873 | C | T | -0.016 | 0.003 | -0.011 | 0.031 |
| rs1772572 | 13 | 81191176 | A | C | -0.017 | 0.003 | -0.011 | 0.033 |
| rs75674569 | 13 | 96823724 | A | G | -0.025 | 0.004 | -0.051 | 0.055 |
| rs7333559 | 13 | 100546450 | A | G | -0.023 | 0.003 | 0.036 | 0.04 |
| rs1108130 | 13 | 100648356 | A | T | 0.024 | 0.003 | -0.007 | 0.038 |
| rs12855717 | 13 | 101252635 | T | C | 0.016 | 0.003 | 0.028 | 0.033 |
| rs12878369 | 14 | 28346502 | A | C | 0.017 | 0.003 | -0.004 | 0.032 |
| rs2145451 | 14 | 29316842 | C | T | -0.02 | 0.003 | -0.004 | 0.04 |
| rs9323328 | 14 | 58653514 | G | A | -0.014 | 0.003 | 0.014 | 0.032 |
| rs1811739 | 14 | 77529375 | A | G | 0.018 | 0.003 | 0.007 | 0.036 |
| rs8005334 | 14 | 79563654 | G | T | 0.017 | 0.003 | 0.033 | 0.032 |
| rs34940743 | 14 | 80102233 | G | A | 0.016 | 0.003 | 0.047 | 0.036 |
| rs2925128 | 14 | 98362355 | T | C | 0.017 | 0.003 | 0.024 | 0.032 |
| rs1381287 | 14 | 98597552 | T | C | 0.018 | 0.003 | -0.015 | 0.031 |
| rs55913542 | 14 | 99693843 | T | G | 0.019 | 0.003 | 0.033 | 0.041 |
| rs1435672 | 15 | 36399479 | C | T | 0.014 | 0.003 | -0.003 | 0.032 |
| rs281296 | 15 | 47685010 | A | G | 0.025 | 0.003 | -0.031 | 0.033 |
| rs56902655 | 15 | 63898709 | G | T | -0.022 | 0.004 | 0.012 | 0.043 |
| rs2289791 | 15 | 67476952 | T | G | -0.018 | 0.003 | -0.023 | 0.037 |
| rs60833441 | 15 | 74048768 | G | A | -0.014 | 0.003 | 0 | 0.032 |
| rs62007780 | 15 | 78025464 | T | G | -0.016 | 0.003 | -0.049 | 0.032 |
| rs12442563 | 15 | 83893243 | T | G | -0.023 | 0.003 | -0.023 | 0.037 |
| rs4310804 | 15 | 96858409 | G | C | -0.018 | 0.003 | 0.054 | 0.037 |
| rs8027457 | 15 | 99204101 | C | T | 0.015 | 0.003 | -0.036 | 0.032 |
| rs1139897 | 16 | 720986 | A | G | -0.024 | 0.003 | -0.065 | 0.037 |
| rs11076962 | 16 | 5811367 | C | T | 0.018 | 0.003 | 0.025 | 0.035 |
| rs7192140 | 16 | 10173748 | C | T | -0.017 | 0.003 | -0.054 | 0.031 |
| rs9922607 | 16 | 17570220 | T | C | -0.022 | 0.003 | -0.012 | 0.041 |
| rs9941217 | 16 | 18050926 | G | C | -0.019 | 0.003 | 0.052 | 0.032 |
| rs7188873 | 16 | 24727064 | G | A | 0.02 | 0.003 | -0.018 | 0.032 |
| rs6497840 | 16 | 25351633 | A | G | 0.023 | 0.003 | 0.079 | 0.035 |
| rs4785187 | 16 | 49766772 | A | G | 0.02 | 0.003 | -0.041 | 0.037 |
| rs8050598 | 16 | 49891964 | T | C | 0.019 | 0.003 | -0.007 | 0.041 |
| rs12918191 | 16 | 50945156 | G | A | -0.02 | 0.003 | -0.007 | 0.036 |
| rs9302604 | 16 | 69576894 | G | A | 0.019 | 0.003 | 0.025 | 0.032 |
| rs9936784 | 16 | 72230694 | G | T | 0.014 | 0.003 | 0.039 | 0.031 |
| rs62052916 | 16 | 72574550 | T | A | -0.032 | 0.005 | 0.043 | 0.057 |
| rs4788676 | 16 | 72950468 | C | T | -0.018 | 0.003 | -0.049 | 0.038 |
| rs117657830 | 16 | 75766873 | G | A | -0.038 | 0.006 | 0.019 | 0.097 |
| rs1050847 | 16 | 87443734 | T | C | -0.015 | 0.003 | -0.097 | 0.032 |
| rs11642231 | 16 | 89608702 | A | G | -0.016 | 0.003 | -0.004 | 0.033 |
| rs4790874 | 17 | 1995177 | T | C | 0.017 | 0.003 | -0.004 | 0.032 |
| rs11078713 | 17 | 7795972 | G | A | -0.015 | 0.003 | 0.06 | 0.032 |
| rs28441558 | 17 | 7803118 | C | R | -0.036 | 0.006 | 0.11 | 0.071 |
| rs11651955 | 17 | 16235462 | A | G | -0.014 | 0.003 | 0.068 | 0.031 |
| rs67777803 | 17 | 27323322 | T | G | -0.025 | 0.003 | -0.017 | 0.041 |
| rs2344976 | 17 | 30685935 | C | T | -0.015 | 0.003 | 0.009 | 0.032 |
| rs3764351 | 17 | 37824339 | A | G | -0.015 | 0.003 | -0.014 | 0.034 |
| rs72836318 | 17 | 44121579 | C | T | -0.017 | 0.003 | 0.024 | 0.043 |
| rs17692129 | 17 | 44793283 | T | C | 0.02 | 0.003 | -0.11 | 0.037 |
| rs75919030 | 17 | 50193197 | C | T | -0.021 | 0.003 | -0.004 | 0.035 |
| rs2938134 | 17 | 50243397 | A | C | -0.018 | 0.003 | 0.03 | 0.033 |
| rs2587507 | 17 | 77790135 | C | T | -0.015 | 0.003 | 0.019 | 0.032 |
| rs34342129 | 18 | 5872472 | C | T | -0.014 | 0.003 | -0.018 | 0.032 |
| rs4476253 | 18 | 25253297 | A | G | -0.018 | 0.003 | -0.033 | 0.037 |
| rs7505855 | 18 | 31696075 | T | C | -0.017 | 0.003 | -0.029 | 0.032 |
| rs8096225 | 18 | 36921851 | C | A | 0.016 | 0.003 | -0.01 | 0.034 |
| rs67050670 | 18 | 39297254 | G | A | -0.02 | 0.003 | -0.043 | 0.038 |
| rs72898831 | 18 | 42658643 | G | A | -0.024 | 0.004 | -0.051 | 0.045 |
| rs8083764 | 18 | 49874515 | T | G | -0.016 | 0.003 | 0.023 | 0.034 |
| rs1373178 | 18 | 49967811 | G | T | -0.02 | 0.003 | -0.048 | 0.032 |
| rs62098013 | 18 | 50863861 | A | G | 0.018 | 0.003 | 0.037 | 0.032 |
| rs72938304 | 18 | 53661743 | A | G | -0.027 | 0.004 | 0.018 | 0.05 |
| rs11872397 | 18 | 72535282 | A | G | -0.017 | 0.003 | -0.033 | 0.039 |
| rs71367544 | 18 | 77574374 | T | C | 0.021 | 0.003 | 0.072 | 0.039 |
| rs76608582 | 19 | 4474725 | A | C | -0.035 | 0.006 | -0.16 | 0.096 |
| rs10853981 | 19 | 4965064 | A | G | 0.015 | 0.003 | 0.056 | 0.033 |
| rs113230003 | 19 | 18460956 | A | G | -0.019 | 0.003 | -0.074 | 0.037 |
| rs8103660 | 19 | 18566395 | C | T | 0.016 | 0.003 | -0.003 | 0.032 |
| rs117734003 | 19 | 51129745 | C | G | 0.03 | 0.005 | 0.17 | 0.067 |
| rs1126757 | 19 | 55879872 | T | C | 0.014 | 0.003 | -0.002 | 0.032 |
| rs6050446 | 20 | 25195509 | G | A | 0.054 | 0.008 | -0.16 | 0.085 |
| rs6058782 | 20 | 29946968 | T | C | 0.03 | 0.004 | 0.042 | 0.053 |
| rs1555445 | 20 | 31175258 | T | A | 0.019 | 0.003 | 0.076 | 0.034 |
| rs6073075 | 20 | 42015801 | A | T | -0.019 | 0.003 | 0.075 | 0.041 |
| rs910912 | 20 | 54462393 | C | T | -0.017 | 0.003 | -0.014 | 0.035 |
| rs6011779 | 20 | 61984317 | T | C | -0.019 | 0.003 | -0.068 | 0.045 |
| rs3810496 | 20 | 62406886 | C | T | 0.016 | 0.003 | 0.013 | 0.033 |
| rs4818005 | 21 | 40588819 | A | G | -0.02 | 0.003 | 0.015 | 0.031 |
| rs139896 | 22 | 38397797 | C | T | 0.015 | 0.003 | 0.081 | 0.033 |
| rs4822102 | 22 | 42698430 | T | C | -0.017 | 0.003 | 0.036 | 0.033 |
| rs9627272 | 22 | 46442288 | C | G | -0.015 | 0.003 | 0.007 | 0.036 |

Abbreviations: PCOS, Polycystic ovary syndrome; Chr, chromosome; SE, standard error; SNP, single nucleotide polymorphism.

| **Supplementary Table 3** The potential secondary phenotypes of the instrumental variables used for smoking initiation (from the GWAS Catalog). | | | |
| --- | --- | --- | --- |
| SNP | Traita | PMID |  |
| rs301807 | Vitiligo | 27723757 |  |
|  | Unipolar depression | 29942085 |  |
|  | Basophil count, eosinophil count | 27863252 |  |
|  | Depressive symptom measurement | 32606422 |  |
| rs45444697 | [Blood protein measurement](https://www.ebi.ac.uk/gwas/efotraits/EFO_0007937) | [29875488](https://www.ebi.ac.uk/gwas/publications/29875488) |  |
| rs1008078 | Self-reported educational attainment | 27225129 |  |
|  | Schizophrenia, intelligence, self-reported educational | 31374203 |  |
|  | Self-reported educational attainment | 30038396 |  |
| rs10914684 | Risk-taking behavior | 30643258 |  |
| rs12740789 | Heart rate response to recovery post exercise | [29497042](https://www.ebi.ac.uk/gwas/publications/29497042) |  |
| rs2901785 | Self-reported educational attainment | 30038396 |  |
| rs10789369 | Schizophrenia | 23974872 |  |
| rs1004787 | Alcohol consumption measurement | 30643251 |  |
|  | Bitter alcoholic beverage consumption measurement | 31046077 |  |
| rs11692435 | Alcohol consumption measurement | 30643258 |  |
|  | Cortical thickness | 32193296 |  |
|  | Alcohol consumption measurement | 30643251 |  |
|  | Bitter alcoholic beverage consumption measurement | 31046077 |  |
|  | Body mass index | 30595370 |  |
|  | Colorectal cancer | 31089142 |  |
| rs11678980 | Self-reported educational attainment | 30038396 |  |
|  | Cognitive function measurement | 30038396 |  |
|  | Mathematical ability | 30038396 |  |
| rs61533748 | Unipolar depression, bipolar disorder | 31926635 |  |
| rs3811038 | Lifetime smoking index | 31689377 |  |
| rs6731872 | Body fat distribution | 30664634 |  |
|  | Alcohol consumption measurement | 30643251 |  |
| rs7585579 | Risk-taking behavior | 30643258 |  |
| rs4674916 | Mathematical ability | 30038396 |  |
| rs62106258 | Diet measurement | 32066663 |  |
|  | Appendicular lean mass | 31761296 |  |
|  | C-reactive protein measurement | 31900758 |  |
|  | Dental caries, dentures | 31235808 |  |
|  | Dentures | 31235808 |  |
|  | Lean body mass | 30593698 |  |
|  | Waist-hip ratio | 30239722 |  |
|  | Visceral adipose tissue measurement | 31501611 |  |
|  | Grip strength measurement | 29691431 |  |
|  | Body mass index | 30595370 |  |
|  | Age at menarche | 30595370 |  |
| rs2710634 | Self-reported educational attainment | 30038396 |  |
|  | Mathematical ability | 30038396 |  |
| rs6756212 | Asthma | 31669095 |  |
| rs17229285 | Ulcerative colitis | 23128233 |  |
| rs11128203 | Risk-taking behavior | 30643258 |  |
| rs2276825 | Wellbeing measurement | 30643256 |  |
| rs748832 | Intelligence | 29326435 |  |
|  | Intelligence, self-reported educational attainment | 29186694 |  |
| rs2526390 | Appendicular lean mass | 31761296 |  |
| rs62246017 | Squamous cell carcinoma | 26829030 |  |
|  | Cutaneous squamous cell carcinoma | 32041948 |  |
| rs9826984 | C-reactive protein measurement | 31900758 |  |
| rs3172494 | Self-reported educational attainment | 27225129 |  |
|  | Household income | 31844048 |  |
| rs2279829 | Risky sexual behavior measurement | 30643258 |  |
|  | Brain volume measurement | 31676860 |  |
|  | Cortical surface area measurement | 32193296 |  |
|  | Alcohol consumption measurement | 30643251 |  |
|  | Parietal lobe volume measurement | 31396565 |  |
| rs2306866 | Self-reported educational attainment | 30038396 |  |
|  | Mathematical ability | 30038396 |  |
| rs58400863 | Risk-taking behavior | 30643258 |  |
| rs12517438 | Wellbeing measurement | 30643256 |  |
| rs72780746 | Risky sexual behavior measurement | 30643258 |  |
| rs329124 | Body mass index | 31669095 |  |
|  | Self-reported educational attainment | 30038396 |  |
|  | Health study participation | 31263887 |  |
| rs3800227 | Body weight | 28552196 |  |
|  | Anxiety measurement | 30867560 |  |
| rs1737329 | Mathematical ability | 30038396 |  |
| rs1059490 | Waist circumference adjusted for body mass index | 31669095 |  |
|  | Highest math class taken | 30038396 |  |
| rs3218116 | Mean corpuscular hemoglobin concentration | 32888493 |  |
| rs10233018 | Unipolar depression, depressive symptom measurement | 27089181 |  |
|  | Depressive symptom measurement | 29292387 |  |
| rs1030015 | Body mass index | 30239722 |  |
| rs11768481 | Lifetime smoking index | 31689377 |  |
| rs11783093 | Schizophrenia | 29483656 |  |
| rs2378662 | Age at menarche | 27182965 |  |
| rs10858334 | Body mass index | 30239722 |  |
|  | Mathematical ability | 30038396 |  |
| rs6474609 | Risk-taking behavior | 30643258 |  |
| rs7026534 | Insomnia measurement | 30804565 |  |
| rs12244388 | Risk-taking behavior | 30643258 |  |
|  | Schizophrenia | 31268507 |  |
| rs28408682 | BMI-adjusted waist-hip ratio | 31669095 |  |
|  | Waist-hip ratio | 30595370 |  |
| rs10905461 | Risk-taking behavior | 30643258 |  |
| rs9787523 | Anorexia nervosa, obsessive-compulsive disorder, attention deficit hyperactivity disorder,  Tourette syndrome, unipolar depression, schizophrenia, autism spectrum disorder, bipolar disorder | 31835028 |  |
| rs7072776 | Breast carcinoma | 29059683 |  |
|  | Sodium measurement | 31409800 |  |
| rs4275621 | Attention deficit hyperactivity disorder | 30478444 |  |
| rs1713676 | Alcohol consumption measurement | 30643251 |  |
| rs6265 | Risk-taking behavior | 30643258 |  |
|  | C-reactive protein measurement | 31900758 |  |
|  | Hip circumference | 25673412 |  |
|  | Waist-hip ratio | 30239722 |  |
|  | Body mass index | 30239722 |  |
|  | Visceral adipose tissue measurement | 31501611 |  |
| rs62618693 | C-reactive protein measurement | 31900758 |  |
|  | Type II diabetes mellitus | 32541925 |  |
| rs4759229 | Adult onset asthma, body mass index | 31669095 |  |
|  | Body mass index, asthma | 31669095 |  |
| rs2925128 | BMI-adjusted waist-hip ratio | 30239722 |  |
| rs1381287 | Risk-taking behavior | 30643258 |  |
| rs281296 | Alcohol use disorder measurement, alcohol consumption measurement | 32451486 |  |
| rs4785187 | Self-reported educational attainment | 30038396 |  |
| rs11076962 | Intelligence | 29942086 |  |
|  | Cognitive function measurement | 30038396 |  |
|  | Self-reported educational attainment | 30038396 |  |
|  | Mathematical ability | 30038396 |  |
| rs7188873 | Intelligence | 29326435 |  |
|  | BMI-adjusted waist circumference | 31669095 |  |
|  | Self-reported educational attainment | 30038396 |  |
|  | Metabolic syndrome | 31589552 |  |
| rs12918191 | Intelligence | 29844566 |  |
| rs1050847 | Cognitive function measurement | 30038396 |  |
|  | Self-reported educational attainment | 30038396 |  |
| rs17692129 | Total cortical area measurement | 32198502 |  |
|  | Neuroticism measurement | 29942085 |  |
| rs3764351 | Sleep duration, high density lipoprotein cholesterol measurement | 31719535 |  |
| rs28441558 | Prostate carcinoma | 29892016 |  |
| rs62098013 | Multisite chronic pain | 31194737 |  |
| rs10853981 | Triglyceride measurement | 30275531 |  |
| rs113230003 | Body mass index | 31669095 |  |
|  | Grip strength measurement | 29691431 |  |
|  | Body mass index | 30595370 |  |
|  | Cardiovascular disease | 30595370 |  |
| rs6050446 | Body mass index | 29273807 |  |
| Abbreviations: Chr, chromosome; EA, effect allele; SNP, single nucleotide polymorphism. | | | |
| a Traits associated with the SNP according to previous genome-wide association studies. | | | |

Supplementary Table 4 Effect estimates of the associations between smoking initiation and risk of polycystic ovary syndrome after excluding potential pleiotropic

| Methods | Number of SNPs | OR | 95% CI |
| --- | --- | --- | --- |
| Inverse-variance weighted | 291 | 1.32 | 1.06-1.64 |
| Likelihood-based | 291 | 1.33 | 1.06-1.67 |
| Weighted median method | 291 | 1.28 | 0.92-1.79 |
| MR-PRESSO test | 291 | 1.32 | 1.05-1.66 |

Abbreviations: CI, confidence interval; MR, Mendelian randomization; MR-PRESSO, MR Pleiotropy RESidual Sum and Outlier; OR, odds ratio; SNP, single nucleotide polymorphism.
